## CORRECTION

# Correction: Unveiling the obstacles encountered by women doctors in the Pakistani healthcare system: A qualitative investigation

Ali Raza, Junaimah Jauhar, Noor Fareen Abdul Rahim, Ubedullah Memon, Sheema Matloob

There is an error in affiliation 3 for author Noor Fareen Abdul Rahim. The correct affiliation 3 is: Graduate School of Business, Universiti Sains Malaysia, Penang, Malaysia.

## Reference

1. Raza A, Jauhar J, Abdul Rahim NF, Memon U, Matloob S (2023) Unveiling the obstacles encountered by women doctors in the Pakistani healthcare system: A qualitative investigation. PLOS ONE 18(10): e0288527. <https://doi.org/10.1371/journal.pone.0288527> PMID: 37796908

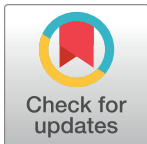

## OPEN ACCESS

**Citation:** Raza A, Jauhar J, Abdul Rahim NF, Memon U, Matloob S (2025) Correction: Unveiling the obstacles encountered by women doctors in the Pakistani healthcare system: A qualitative investigation. PLoS ONE 20(1): e0318366. <https://doi.org/10.1371/journal.pone.0318366>

**Published:** January 24, 2025

**Copyright:** © 2025 Raza et al. This is an open access article distributed under the terms of the [Creative Commons Attribution License](https://creativecommons.org/licenses/by/4.0/), which permits unrestricted use, distribution, and reproduction in any medium, provided the original author and source are credited.
